# Supplementary material for: Hybrid Models for Solving the Colebrook–White Equation Using Artificial Neural Networks
Source: MDPI journal article supplement (doi:10.3390/fluids7070211), 2022-06-21
Supplement: s1 [file s1]

The following shows listed the equations and coefficients for hybrid formulas (existing formula + ANN model 2 and 3) used for the models of Chen [29], Schorle et al. [30], Barr and White [31], Models Sousa et al. [32], and Ofor and Alabi [33].

a. The hybrid model 2 for the formula of Chen [29]:

$$f_{H,Chen} = \left[ -2\log \left[ \frac{\varepsilon}{3.7065D} - \frac{5.0452}{Re} \log \left( \frac{1}{2.8257} \left( \frac{\varepsilon}{D} \right)^{1.1098} + \frac{5.8506}{Re^{0.8981}} \right) \right] \right]^{-2} \\ + 10^{-6} [E_1 \tanh(a_1 \zeta + b_1 \eta + c_1) + E_2 \tanh(a_2 \zeta + b_2 \eta + c_2) + E_3 \tanh(a_3 \zeta + b_3 \eta + c_3) \\ + E_4 \tanh(a_4 \zeta + b_4 \eta + c_4) + E_5 \tanh(a_5 \zeta + b_5 \eta + c_5) + E_6 \tanh(a_6 \zeta + b_6 \eta + c_6) \\ + E_7 \tanh(a_7 \zeta + b_7 \eta + c_7) + F] \quad (S.1)$$

b. The hybrid model 2 for the formula of Schorle et al. [30],

$$f_{H,S} = \left[ -2\log \left[ \frac{\varepsilon}{3.7D} - \frac{5.02}{Re} \log \left( \frac{\varepsilon}{3.7D} + \frac{14.5}{Re} \right) \right] \right]^{-2} \\ + 10^{-6} [E_1 \tanh(a_1 \zeta + b_1 \eta + c_1) + E_2 \tanh(a_2 \zeta + b_2 \eta + c_2) + E_3 \tanh(a_3 \zeta + b_3 \eta + c_3) \\ + E_4 \tanh(a_4 \zeta + b_4 \eta + c_4) + E_5 \tanh(a_5 \zeta + b_5 \eta + c_5) + E_6 \tanh(a_6 \zeta + b_6 \eta + c_6) \\ + E_7 \tanh(a_7 \zeta + b_7 \eta + c_7) + F] \quad (S.2)$$

b. The hybrid model 2 for the formula of Bar and White [31],

$$f_{H,BW} = \left[ -2\log \left\{ \frac{\varepsilon}{3.7D} + \frac{4.518 \log \left( \frac{Re}{7} \right)}{Re \left[ 1 + \frac{Re^{0.02}}{29} \left( \frac{\varepsilon}{D} \right)^{0.7} \right]} \right\} \right]^{-2} \\ + 10^{-6} [E_1 \tanh(a_1 \zeta + b_1 \eta + c_1) + E_2 \tanh(a_2 \zeta + b_2 \eta + c_2) + E_3 \tanh(a_3 \zeta + b_3 \eta + c_3) \\ + E_4 \tanh(a_4 \zeta + b_4 \eta + c_4) + E_5 \tanh(a_5 \zeta + b_5 \eta + c_5) + E_6 \tanh(a_6 \zeta + b_6 \eta + c_6) \\ + E_7 \tanh(a_7 \zeta + b_7 \eta + c_7) + F] \quad (S.3)$$

d. The hybrid model 2 for the formula of Sousa et al., [32]

$$f_{H,So} = \left[ -2\log \left[ \frac{\varepsilon}{3.7D} - \frac{5.16}{Re} \left( \frac{\varepsilon}{3.7D} + \frac{5.09}{Re^{0.87}} \right) \right] \right]^{-2} \\ + 10^{-6} [E_1 \tanh(a_1 \zeta + b_1 \eta + c_1) + E_2 \tanh(a_2 \zeta + b_2 \eta + c_2) + E_3 \tanh(a_3 \zeta + b_3 \eta + c_3) \\ + E_4 \tanh(a_4 \zeta + b_4 \eta + c_4) + E_5 \tanh(a_5 \zeta + b_5 \eta + c_5) + E_6 \tanh(a_6 \zeta + b_6 \eta + c_6) \\ + E_7 \tanh(a_7 \zeta + b_7 \eta + c_7) + F] \quad (S.4)$$

e. The hybrid model 2 for the formula of Ofor and Alabi [33]

$$f_{H,of} = \left[ -2\log \left\{ \frac{\varepsilon}{3.71D} - \frac{1.975}{Re} \left( \ln \left( \left( \frac{\varepsilon}{15.72R} \right)^{1.092} + \left( \frac{7.627}{Re + 395.9} \right) \right) \right) \right\} \right]^{-2} \\ + 10^{-6} [E_1 \tanh(a_1 \zeta + b_1 \eta + c_1) + E_2 \tanh(a_2 \zeta + b_2 \eta + c_2) + E_3 \tanh(a_3 \zeta + b_3 \eta + c_3) \\ + E_4 \tanh(a_4 \zeta + b_4 \eta + c_4) + E_5 \tanh(a_5 \zeta + b_5 \eta + c_5) + E_6 \tanh(a_6 \zeta + b_6 \eta + c_6) \\ + E_7 \tanh(a_7 \zeta + b_7 \eta + c_7) + F] \quad (S.5)$$

The Coefficients  $a$ ,  $b$ ,  $c$ , and  $E$  for the hybrid models Eq. (S.1) to (S.3)) are shown in Table S.1 and for hybrid models Eqs. (S4) and (S5) are shown in Table l S2.

**Table S1.** The coefficient of hybrid model 2 of Chen [29], Schorle et al [30], and Barr and White [31], represented by Equations (S1), (S2), and (S3), respectively.

| Hybrid Model.                                | Coefficients |                |                |                |                    |
|----------------------------------------------|--------------|----------------|----------------|----------------|--------------------|
|                                              | k            | a <sub>k</sub> | b <sub>k</sub> | c <sub>k</sub> | E <sub>k</sub> & F |
| Chen, [9] + ANN (2-7-1), Eq. (S1)            | 1            | -0.22895       | -1.92941       | 2.48445        | 46.983             |
|                                              | 2            | -1.65093       | -3.29912       | -2.00805       | -21.328            |
|                                              | 3            | 2.68661        | -3.75265       | -5.86613       | 5.027              |
|                                              | 4            | 2.76529        | 2.21235        | 1.29194        | 1281.312           |
|                                              | 5            | -3.02927       | -2.62628       | -1.54637       | 2264.769           |
|                                              | 6            | 3.39868        | 3.12021        | 1.85289        | 976.187            |
|                                              | 7            | 6.12918        | 0.20538        | 6.43163        | -453.501           |
|                                              | 8            |                |                | F =            | 397.428            |
| Schorle et al., [25] + ANN (2-7-1), Eq. (S2) | 1            | 0.72198        | -0.06450       | 1.50837        | 711.242            |
|                                              | 2            | -0.03236       | -0.53817       | 1.76410        | 5639.952           |
|                                              | 3            | -0.00181       | 0.74607        | -0.77848       | 844.718            |
|                                              | 4            | 2.40883        | 1.81017        | 0.28952        | 233.901            |
|                                              | 5            | 3.67332        | -0.01913       | 5.66030        | -32971.849         |
|                                              | 6            | -2.40733       | -1.65760       | -0.07438       | 206.935            |
|                                              | 7            | -3.20530       | 1.71559        | -5.65000       | -2062.784          |
|                                              | 8            |                |                | F =            | 25432.108          |
| Barr and White [2] + ANN (2-7-1), Eq. (S3)   | 1            | 1.96283        | 0.28360        | 2.98361        | -434789.0          |
|                                              | 2            | 0.98364        | -1.07863       | 1.79173        | 125578.4           |
|                                              | 3            | 0.98645        | -1.07247       | 1.75365        | -116870.0          |
|                                              | 4            | -1.63008       | 0.58571        | -2.63955       | 516012.9           |
|                                              | 5            | -1.68764       | 0.40038        | -2.66833       | -1257888.2         |
|                                              | 6            | -1.78750       | 0.13192        | -2.75933       | 1450592.4          |
|                                              | 7            | 1.89515        | 0.12706        | 2.88146        | 1119738.4          |
|                                              | 8            |                |                | F =            | 15057.6            |

**Table S2.** The coefficient of hybrid model 2 of Sousa et al. [32] and Offor and Alabi [33], represented by Equations (S4) and (S5), respectively.

| Hybrid Model                               | Coefficients |                |                |                |                    |
|--------------------------------------------|--------------|----------------|----------------|----------------|--------------------|
|                                            | k            | a <sub>k</sub> | b <sub>k</sub> | c <sub>k</sub> | E <sub>k</sub> & F |
| Sousa et al., [28] + ANN (2-7-1), Eq. (S4) | 1            | 1.09341        | 3.13224        | -4.02045       | 149.020            |
|                                            | 2            | 0.49380        | 2.31649        | -3.61171       | -841.302           |
|                                            | 3            | 5.91829        | -0.00693       | 6.53159        | -529.318           |
|                                            | 4            | 2.18236        | 1.20692        | 1.23765        | 307.234            |
|                                            | 5            | 2.88144        | -3.53466       | 6.70302        | 224.023            |
|                                            | 6            | 2.50932        | 1.71597        | 1.49374        | -517.202           |
|                                            | 7            | -2.94989       | -2.25659       | -1.83661       | -233.899           |
|                                            | 8            |                |                | F =            | -414.143           |
| Offor and Alabi [19] +                     | 1            | 2.12823        | 0.54601        | 2.54974        | 73.003             |
|                                            | 2            | 4.24131        | 2.64972        | -0.72078       | -1.246             |
|                                            | 3            | -4.31415       | -3.81400       | -1.92845       | -231.692           |

|   |          |          |          |          |
|---|----------|----------|----------|----------|
| 4 | 4.28357  | 3.83633  | 1.95012  | -230.451 |
| 5 | 4.19568  | 0.58768  | 3.74202  | -62.931  |
| 6 | 14.97284 | -3.96590 | 18.31466 | -86.335  |
| 7 | 8.77714  | -0.08176 | 9.92507  | 929.391  |
| 8 |          |          | $F =$    | -852.616 |

---

a. The hybrid model 3 for the formula of Chen [24],

$$f_{H,Chen} = \left[ -2 \log \left[ \frac{\varepsilon}{3.71D} - \frac{5.0452}{Re} \log \left( \frac{1}{2.8257} \left( \frac{\varepsilon}{D} \right)^{1.1098} + \frac{5.8506}{Re^{0.8981}} \right) \right] \right]^{-2} \\ + 10^{-6} [E_1 \tanh(a_1 \zeta + b_1 \eta + c_1) + E_2 \tanh(a_2 \zeta + b_2 \eta + c_2) + E_3 \tanh(a_3 \zeta + b_3 \eta + c_3) \\ + E_4 \tanh(a_4 \zeta + b_4 \eta + c_4) + E_5 \tanh(a_5 \zeta + b_5 \eta + c_5) + E_6 \tanh(a_6 \zeta + b_6 \eta + c_6) \\ + E_7 \tanh(a_7 \zeta + b_7 \eta + c_7) + E_8 \tanh(a_8 \zeta + b_8 \eta + c_8) + E_9 \tanh(a_9 \zeta + b_9 \eta + c_9) \\ + E_{10} \tanh(a_{10} \zeta + b_{10} \eta + c_{10}) + F] \quad (S.6)$$

b. The hybrid model 3 for the formula of Schorle et al. [26],

$$f_{H,S} = \left[ -2 \log \left[ \frac{\varepsilon}{3.7D} - \frac{5.02}{Re} \log \left( \frac{\varepsilon}{3.7D} + \frac{14.5}{Re} \right) \right] \right]^{-2} \\ + 10^{-6} [E_1 \tanh(a_1 \zeta + b_1 \eta + c_1) + E_2 \tanh(a_2 \zeta + b_2 \eta + c_2) + E_3 \tanh(a_3 \zeta + b_3 \eta + c_3) \\ + E_4 \tanh(a_4 \zeta + b_4 \eta + c_4) + E_5 \tanh(a_5 \zeta + b_5 \eta + c_5) + E_6 \tanh(a_6 \zeta + b_6 \eta + c_6) \\ + E_7 \tanh(a_7 \zeta + b_7 \eta + c_7) + E_8 \tanh(a_8 \zeta + b_8 \eta + c_8) + E_9 \tanh(a_9 \zeta + b_9 \eta + c_9) \\ + E_{10} \tanh(a_{10} \zeta + b_{10} \eta + c_{10}) + F] \quad (S.7)$$

c. The hybrid model 3 for the formula of Bar and White [39],

$$f_{H,BW} = \left[ -2 \log \left\{ \frac{\varepsilon}{3.7D} + \frac{4.518 \log \left( \frac{Re}{7} \right)}{Re \left[ 1 + \frac{Re^{0.02}}{29} \left( \frac{\varepsilon}{D} \right)^{0.7} \right]} \right\} \right]^{-2} \\ + 10^{-6} [E_1 \tanh(a_1 \zeta + b_1 \eta + c_1) + E_2 \tanh(a_2 \zeta + b_2 \eta + c_2) + E_3 \tanh(a_3 \zeta + b_3 \eta + c_3) \\ + E_4 \tanh(a_4 \zeta + b_4 \eta + c_4) + E_5 \tanh(a_5 \zeta + b_5 \eta + c_5) + E_6 \tanh(a_6 \zeta + b_6 \eta + c_6) \\ + E_7 \tanh(a_7 \zeta + b_7 \eta + c_7) + E_8 \tanh(a_8 \zeta + b_8 \eta + c_8) + E_9 \tanh(a_9 \zeta + b_9 \eta + c_9) \\ + E_{10} \tanh(a_{10} \zeta + b_{10} \eta + c_{10}) + F] \quad (S.8)$$

d. The hybrid model 3 for the formula of 4 Sousa et al. [40],

$$f_{H,So} = \left[ -2 \log \left[ \frac{\varepsilon}{3.7D} - \frac{5.16}{Re} \left( \frac{\varepsilon}{3.7D} + \frac{5.09}{Re^{0.87}} \right) \right] \right]^{-2} \\ + 10^{-6} [E_1 \tanh(a_1 \zeta + b_1 \eta + c_1) + E_2 \tanh(a_2 \zeta + b_2 \eta + c_2) + E_3 \tanh(a_3 \zeta + b_3 \eta + c_3) \\ + E_4 \tanh(a_4 \zeta + b_4 \eta + c_4) + E_5 \tanh(a_5 \zeta + b_5 \eta + c_5) + E_6 \tanh(a_6 \zeta + b_6 \eta + c_6) \\ + E_7 \tanh(a_7 \zeta + b_7 \eta + c_7) + E_8 \tanh(a_8 \zeta + b_8 \eta + c_8) + E_9 \tanh(a_9 \zeta + b_9 \eta + c_9) \\ + E_{10} \tanh(a_{10} \zeta + b_{10} \eta + c_{10}) + F] \quad (S.9)$$

e. The hybrid model 3 for the formula of Offor and Alabi [41]

$$f_{H,of} = \left[ -2 \log \left\{ \frac{\varepsilon}{3.71D} - \frac{1.975}{Re} \left( \ln \left( \left( \frac{\varepsilon}{15.72R} \right)^{1.092} + \left( \frac{7.627}{Re + 395.9} \right) \right) \right) \right\} \right]^{-2} \\ + 10^{-6} [E_1 \tanh(a_1 \zeta + b_1 \eta + c_1) + E_2 \tanh(a_2 \zeta + b_2 \eta + c_2) + E_3 \tanh(a_3 \zeta + b_3 \eta + c_3) \\ + E_4 \tanh(a_4 \zeta + b_4 \eta + c_4) + E_5 \tanh(a_5 \zeta + b_5 \eta + c_5) + E_6 \tanh(a_6 \zeta + b_6 \eta + c_6) \\ + E_7 \tanh(a_7 \zeta + b_7 \eta + c_7) + E_8 \tanh(a_8 \zeta + b_8 \eta + c_8) + E_9 \tanh(a_9 \zeta + b_9 \eta + c_9) \\ + E_{10} \tanh(a_{10} \zeta + b_{10} \eta + c_{10}) + F] \quad (S.10)$$

The Coefficients  $a$ ,  $b$ ,  $c$ ,  $E$ , and  $F$  for hybrid models Eq. (S.6) to (S.8) are shown in Table S.3 and for hybrid models Eqs. (S9) and (S10) are given in Table S4.

**Table S3.** The coefficient of hybrid model 3 of Chen [29], Schorle et al [30], and Barr and White [31], represented by Equations (S6), (S7), and (S8), respectively.

| Hybrid Model                                   | $k$ | Coefficients |          |          |            |
|------------------------------------------------|-----|--------------|----------|----------|------------|
|                                                |     | $a_k$        | $b_k$    | $c_k$    | $E_k \& F$ |
| Eq.2 of Chen, [9] +<br>ANN (2-10-1)            | 1   | 1.58069      | 2.42043  | 0.78809  | 72.356     |
|                                                | 2   | 0.16718      | 2.11576  | -3.58089 | -189.251   |
|                                                | 3   | 2.60078      | 2.73782  | 0.30017  | 436.979    |
|                                                | 4   | 2.95878      | 1.64840  | 1.75059  | -303.888   |
|                                                | 5   | 5.63389      | 0.29719  | 6.43170  | -1231.992  |
|                                                | 6   | 0.31999      | 5.27171  | 0.80008  | -0.593     |
|                                                | 7   | 2.41782      | 2.68432  | 0.41542  | -512.617   |
|                                                | 8   | -8.15449     | -1.14541 | -8.97223 | -212.087   |
|                                                | 9   | -2.86657     | -1.46605 | -1.59411 | -322.293   |
|                                                | 10  | 0.07378      | -0.74006 | 3.03964  | 314.358    |
|                                                | 11  |              |          | $F =$    | 501.393    |
| Eq.3 of Schorle et al.<br>[25], + ANN (2-10-1) | 1   | -1.41636     | -2.10024 | -1.79082 | 28.533     |
|                                                | 2   | 0.14778      | -2.13326 | 2.30507  | 95.065     |
|                                                | 3   | 3.11490      | 0.94558  | 1.60287  | 57.759     |
|                                                | 4   | 1.09514      | -3.21836 | -0.46434 | 1.332      |
|                                                | 5   | -2.59735     | 1.55933  | -5.37528 | -5534.003  |
|                                                | 6   | 4.18265      | 2.73811  | 1.26745  | 29.939     |
|                                                | 7   | -2.14519     | 0.34764  | -3.81018 | 5445.459   |
|                                                | 8   | -5.10230     | -4.99745 | -1.31512 | -16.979    |
|                                                | 9   | -5.31892     | -0.11907 | -7.24517 | 23475.301  |
|                                                | 10  | 10.17892     | 0.39903  | 10.77632 | 383.005    |
|                                                | 11  |              |          | $F =$    | 22825.679  |
| Eq.4 of Barr and White [2],<br>ANN (2-10-1)    | 1   | -2.89777     | -2.40777 | -1.21183 | -1533.345  |
|                                                | 2   | -0.98338     | 1.19041  | -1.86288 | -5646.552  |
|                                                | 3   | 3.79875      | -1.64147 | -1.19354 | -8.470     |
|                                                | 4   | -3.36534     | -2.77242 | -1.37971 | -2969.495  |
|                                                | 5   | -3.10932     | -2.32403 | -1.14439 | -4893.810  |
|                                                | 6   | 3.15546      | 2.48195  | 1.22979  | -9379.429  |
|                                                | 7   | 2.61564      | -0.83774 | 3.59803  | 11898.594  |
|                                                | 8   | -1.07501     | 1.17273  | -1.73326 | 4483.876   |
|                                                | 9   | -2.48780     | 1.21623  | -3.50648 | 5901.480   |
|                                                | 10  | -3.37116     | 0.44887  | -4.34176 | 6984.953   |
|                                                | 11  |              |          | $F =$    | -180.736   |

**Table S4.** The coefficient of hybrid model 3 of Sousa et al., [32] and Offor and Alabi [33], represented by Equations (S9) and (S10), respectively.

| Hybrid Model                                 | k  | Coefficients |          |           |            |
|----------------------------------------------|----|--------------|----------|-----------|------------|
|                                              |    | $a_k$        | $b_k$    | $c_k$     | $E_k \& F$ |
| Eq.5 of Sousa et al.,<br>[28] + ANN (2-10-1) | 1  | 0.00195      | 2.07449  | -3.47762  | -701.550   |
|                                              | 2  | 0.54763      | -1.66809 | -0.42752  | 2.707      |
|                                              | 3  | -2.62691     | -0.85109 | -1.62278  | 79.879     |
|                                              | 4  | 1.66562      | -1.73416 | 3.77934   | -490.130   |
|                                              | 5  | -4.51639     | -4.03650 | -0.52404  | 238.471    |
|                                              | 6  | -4.51031     | -4.01228 | -0.49318  | -234.117   |
|                                              | 7  | -2.47356     | -0.63194 | -1.50239  | -112.400   |
|                                              | 8  | 4.64807      | 2.69375  | 5.30983   | -2.483     |
|                                              | 9  | -1.92863     | 1.98379  | -4.69849  | -1284.642  |
|                                              | 10 | 5.22836      | -0.00411 | 6.26241   | -1092.298  |
|                                              | 11 |              |          | $F =$     | -434.577   |
| Eq.2 of Offor and Alabi<br>[19] ANN (2-10-1) | 1  | -1.98690     | 1.60710  | 2.23040   | 11.912     |
|                                              | 2  | 4.74080      | 2.41210  | -0.13435  | -3.453     |
|                                              | 3  | 3.98380      | 4.07240  | 1.47710   | 107.168    |
|                                              | 4  | -0.62084     | 1.52900  | 1.39420   | -81.669    |
|                                              | 5  | -0.37651     | 1.52880  | 1.28730   | 73.016     |
|                                              | 6  | 3.21360      | 0.18841  | 1.80680   | 10.154     |
|                                              | 7  | 14.05300     | -3.14920 | 16.92260  | -117.138   |
|                                              | 8  | 4.12450      | 0.54640  | 3.42460   | -40.374    |
|                                              | 9  | -3.86810     | -4.11380 | -1.53690  | 105.705    |
|                                              | 10 | -9.67580     | 0.05652  | -10.50220 | -533.297   |
|                                              | 11 |              |          | $F =$     | -387.171   |
